# Supplementary material for: Intestinal Dysbiosis in Rats: Interaction between Amoxicillin and Probiotics, a Histological and Immunohistochemical Evaluation
Source: MDPI journal article supplement (doi:10.3390/nu15051105), 2023-02-23
Supplement: s1 [file s1]

Supplementary file

Table S1. Semi-quantitative staining scores [median (IQR), range 0–9] for LBP and TLR 4 markers in the 3 intestinal segments.

| Group               | Intestinal segment | LBP         | TLR4        |
|---------------------|--------------------|-------------|-------------|
| <b>G1</b>           | Duodenum           | 1 (0 – 2)   | 1 (0 – 2)   |
|                     | Jejunum            | 1 (0 – 2)   | 1 (0 – 2)   |
|                     | Colon              | 1 (0 – 1)   | 1 (0 – 2)   |
| <b>G2 (ABX)</b>     | Duodenum           | 5 (0 – 6)*  | 5 (1 – 6)*  |
|                     | Jejunum            | 2 (1 – 6)*  | 2 (1 – 6)*  |
|                     | Colon              | 2 (0 – 5)*  | 5 (2 – 6)*  |
| <b>G3 (PRB)</b>     | Duodenum           | 5 (1 – 5)*# | 5 (1 – 6)*# |
|                     | Jejunum            | 5 (1 – 6)*# | 3 (1 – 6)*# |
|                     | Colon              | 2 (0 – 6)*# | 1 (1 – 6)*  |
| <b>G4 (ABX+PRB)</b> | Duodenum           | 3 (0 – 6)*  | 2 (0 – 6)*  |
|                     | Jejunum            | 2 (1 – 6)*  | 3 (1 – 5)*# |
|                     | Colon              | 1 (0 – 2)   | 1 (0 – 3)   |
| <b>G5 (ABX/PRB)</b> | Duodenum           | 5 (1 – 5)*# | 3 (0 – 6)*  |
|                     | Jejunum            | 3 (1 – 6)*# | 2 (1 – 5)*# |
|                     | Colon              | 1 (0 – 3)*# | 2 (1 – 5)*  |

\*p<0.05 vs **G1 (control)** for Mann–Whitney U-test

#p > 0.05 vs **G2 (ABX)** for Mann–Whitney U-test

Figure S1. Graphical representation of the staining scores, represented as mean  $\pm$  SEM and Mann–Whitney U-test results

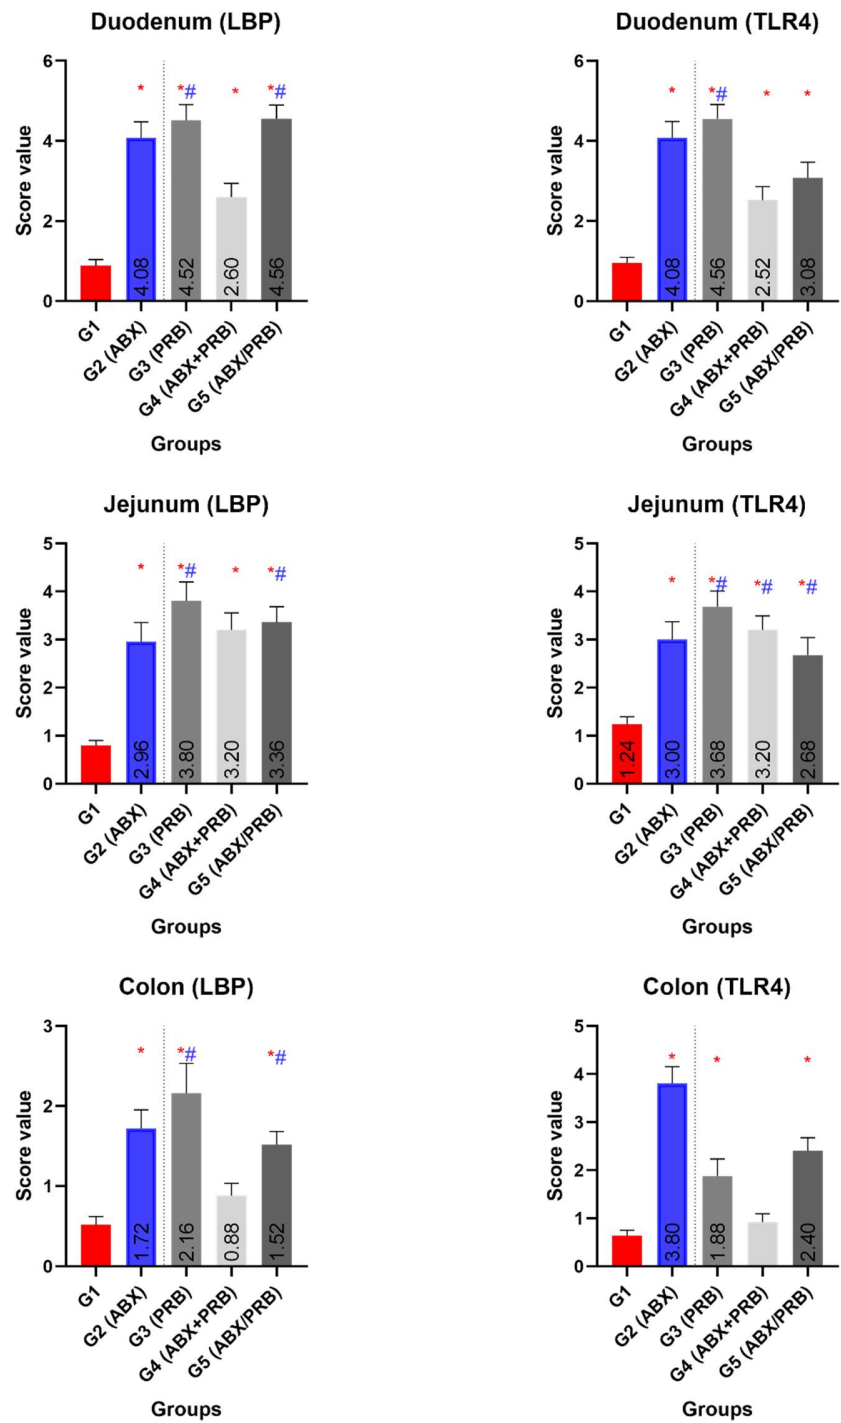

\*p<0.05 vs G1 (control) for Mann–Whitney U-test  
#p > 0.05 vs G2 (ABX) for Mann–Whitney U-test
